# Supplementary material for: Liberal transfusion strategy to prevent mortality and anaemia-associated, ischaemic events in elderly non-cardiac surgical patients – the study design of the LIBERAL-Trial
Source: Trials. 2019 Feb 4;20:101. doi: 10.1186/s13063-019-3200-3 (PMC6360712; doi:10.1186/s13063-019-3200-3)
Supplement: Supplementary file 1 — SPIRIT 2013 Checklist. Recommended items to address in a clinical trial protocol and related documents*. (DOCX 52 kb) [file 13063_2019_3200_MOESM1_ESM.docx]

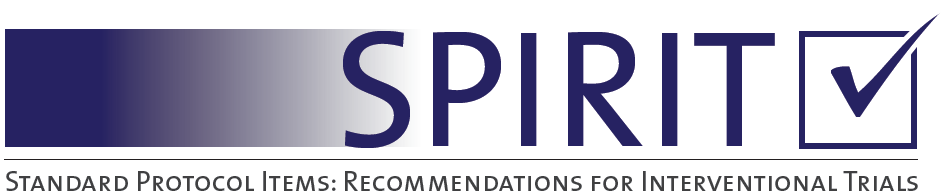


SPIRIT 2013 Checklist: Recommended items to address in a clinical trial protocol and related documents*

| Section/item | ItemNo | Description |
| --- | --- | --- |
| **Administrative information** | | |
| Title | 1 | Liberal transfusion strategy to prevent mortality and anaemia-associated, ischaemic events in elderly non-cardiac surgical patients – the study design of the LIBERAL-Trial  Page 1 |
| Trial registration | 2a | ClinicalTrials.gov (identifier: NCT03369210)  EudraCT-Nr.: 2016-004446-29  Page 4 |
| 2b | All items from the World Health Organization Trial Registration Data Set  yes |
| Protocol version | 3 | 17/10/2017, version 3.0 |
| Funding | 4 | German Research Foundation (ME 3559/3-1), financial, material, and other support  Page 11 |
| Roles and responsibilities | 5a | Coordinating Investigator  Prof. Dr. med. Patrick Meybohm  Department of Anaesthesiology, Intensive Care Medicine and Pain Therapy  University Hospital Frankfurt  Theodor-Stern-Kai 7  60590 Frankfurt am Main, Germany  Biometry  Dr. rer. med. Dirk Hasenclever  Institute for Medical Informatics, Statistics and Epidemiology, University of Leipzig Härtelstraße 16-18, 04107 Leipzig, Germany  Study protocol |
| 5b | Name and contact information for the trial sponsor:  J.-W. von Goethe-Universität  Grünebergplatz 1; 60323 Frankfurt am Main, Germany  ->Study protocol |
|  | 5c | Role of study sponsor and funders, funding and responsibility of study conduct  ->Study protocol |
|  | 5d | Composition, roles, and responsibilities of the coordinating centre, steering committee, endpoint adjudication committee, data management team, and other individuals or groups overseeing the trial, if applicable (see Item 21a for data monitoring committee)  Data Monitoring Safety Board (DMSB)  Dr. Veronika Brixner  Institute for Transfusion Medicine and Immunohaematology Frankfurt/Main  German Red Cross Blood Transfusion Service Baden-Wuerttemberg – Hessen,  Sandhofstraße 1, D-60528 Frankfurt, Germany  PD Dr. David Baron, EDIC  Department of Anaesthesia, General Intensive Care Medicine and Pain Therapy  Medical University Vienna  Prof. Dr. Eva Herrmann  Department of Medicine, Institute of Biostatistics and Mathematical Modelling, Goethe University Frankfurt,  Germany; (Statistics) |
| Introduction |  |  |
| Background and rationale | 6a | Description of research question and justification for undertaking the trial, including summary of relevant studies (published and unpublished) examining benefits and harms for each intervention  ->page 5 |
|  | 6b | Explanation for choice of comparators  Page 6 |
| Objectives | 7 | Specific objectives or hypotheses  Page 5 |
| Trial design | 8 | Description of trial design including type of trial (eg, parallel group, crossover, factorial, single group), allocation ratio, and framework (eg, superiority, equivalence, noninferiority, exploratory)  Page 5-6 |
| Methods: Participants, interventions, and outcomes | | |
| Study setting | 9 | Description of study settings (eg, community clinic, academic hospital) and list of countries where data will be collected. Reference to where list of study sites can be obtained  Page 1, 5, 11-13 |
| Eligibility criteria | 10 | Inclusion and exclusion criteria for participants. If applicable, eligibility criteria for study centres and individuals who will perform the interventions (eg, surgeons, psychotherapists)  Page 5,6 |
| Interventions | 11a | Interventions for each group with sufficient detail to allow replication, including how and when they will be administered  Page 6 |
| 11b | Criteria for discontinuing or modifying allocated interventions for a given trial participant (eg, drug dose change in response to harms, participant request, or improving/worsening disease)  Page 6 + study protocol |
| 11c | Strategies to improve adherence to intervention protocols, and any procedures for monitoring adherence (eg, drug tablet return, laboratory tests)  Page 9 + study protocol |
| 11d | Relevant concomitant care and interventions that are permitted or prohibited during the trial  Page 6 + study protocol |
| Outcomes | 12 | Primary, secondary, and other outcomes, including the specific measurement variable (eg, systolic blood pressure), analysis metric (eg, change from baseline, final value, time to event), method of aggregation (eg, median, proportion), and time point for each outcome. Explanation of the clinical relevance of chosen efficacy and harm outcomes is strongly recommended  Page 6-7 |
| Participant timeline | 13 | Time schedule of enrolment, interventions (including any run-ins and washouts), assessments, and visits for participants. A schematic diagram is highly recommended (see Figure)  Page 6 |
| Sample size | 14 | Estimated number of participants needed to achieve study objectives and how it was determined, including clinical and statistical assumptions supporting any sample size calculations  Page 8 |
| Recruitment | 15 | Strategies for achieving adequate participant enrolment to reach target sample size  Page 8 + study protocol |
| **Methods: Assignment of interventions (for controlled trials)** | | |
| Allocation: |  |  |
| Sequence generation | 16a | Method of generating the allocation sequence (eg, computer-generated random numbers), and list of any factors for stratification. To reduce predictability of a random sequence, details of any planned restriction (eg, blocking) should be provided in a separate document that is unavailable to those who enrol participants or assign interventions  Page 8 + study protocol |
| Allocation concealment mechanism | 16b | Mechanism of implementing the allocation sequence (eg, central telephone; sequentially numbered, opaque, sealed envelopes), describing any steps to conceal the sequence until interventions are assigned  Page 6 + Study protocol |
| Implementation | 16c | Who will generate the allocation sequence, who will enrol participants, and who will assign participants to interventions  Page 6 + Study protocol |
| Blinding (masking) | 17a | Who will be blinded after assignment to interventions (eg, trial participants, care providers, outcome assessors, data analysts), and how  Page 8 + study protocol |
|  | 17b | If blinded, circumstances under which unblinding is permissible, and procedure for revealing a participant’s allocated intervention during the trial  study protocol |
| **Methods: Data collection, management, and analysis** | | |
| Data collection methods | 18a | Plans for assessment and collection of outcome, baseline, and other trial data, including any related processes to promote data quality (eg, duplicate measurements, training of assessors) and a description of study instruments (eg, questionnaires, laboratory tests) along with their reliability and validity, if known. Reference to where data collection forms can be found, if not in the protocol  Page 9 |
|  | 18b | Plans to promote participant retention and complete follow-up, including list of any outcome data to be collected for participants who discontinue or deviate from intervention protocols  Page 8 |
| Data management | 19 | Plans for data entry, coding, security, and storage, including any related processes to promote data quality (eg, double data entry; range checks for data values). Reference to where details of data management procedures can be found, if not in the protocol  Study protocol |
| Statistical methods | 20a | Statistical methods for analysing primary and secondary outcomes. Reference to where other details of the statistical analysis plan can be found, if not in the protocol  Page 8 |
|  | 20b | Methods for any additional analyses (eg, subgroup and adjusted analyses)  Page 8+9 |
|  | 20c | Definition of analysis population relating to protocol non-adherence (eg, as randomised analysis), and any statistical methods to handle missing data (eg, multiple imputation)  Page 8+9 |
| **Methods: Monitoring** | | |
| Data monitoring | 21a | Composition of data monitoring committee (DMC); summary of its role and reporting structure; statement of whether it is independent from the sponsor and competing interests; and reference to where further details about its charter can be found, if not in the protocol. Alternatively, an explanation of why a DMC is not needed  Page 9 |
|  | 21b | Description of any interim analyses and stopping guidelines, including who will have access to these interim results and make the final decision to terminate the trial  Page 8+9 |
| Harms | 22 | Plans for collecting, assessing, reporting, and managing solicited and spontaneously reported adverse events and other unintended effects of trial interventions or trial conduct  Study protocol |
| Auditing | 23 | Frequency and procedures for auditing trial conduct, if any, and whether the process will be independent from investigators and the sponsor  no |
| Ethics and dissemination | | |
| Research ethics approval | 24 | Plans for seeking research ethics committee/institutional review board (REC/IRB) approval  Study protocol V3.0 (EudraCT-Nr 2016-004446-29), patient information, and informed consent were approved by the Ethics Committee of the University of Frankfurt (Ref: 139/17F) and of all participating centres |
| Protocol amendments | 25 | Plans for communicating important protocol modifications (eg, changes to eligibility criteria, outcomes, analyses) to relevant parties (eg, investigators, REC/IRBs, trial participants, trial registries, journals, regulators)  Not yet planned |
| Consent or assent | 26a | Who will obtain informed consent or assent from potential trial participants or authorised surrogates, and how (see Item 32)  Page 5+6 |
|  | 26b | Additional consent provisions for collection and use of participant data and biological specimens in ancillary studies, if applicable  no |
| Confidentiality | 27 | How personal information about potential and enrolled participants will be collected, shared, and maintained in order to protect confidentiality before, during, and after the trial  Study protocol |
| Declaration of interests | 28 | Financial and other competing interests for principal investigators for the overall trial and each study site  YES |
| Access to data | 29 | Statement of who will have access to the final trial dataset, and disclosure of contractual agreements that limit such access for investigators  Page 10 |
| Ancillary and post-trial care | 30 | Provisions, if any, for ancillary and post-trial care, and for compensation to those who suffer harm from trial participation  Not applicable |
| Dissemination policy | 31a | Plans for investigators and sponsor to communicate trial results to participants, healthcare professionals, the public, and other relevant groups (eg, via publication, reporting in results databases, or other data sharing arrangements), including any publication restrictions  Study protocol |
|  | 31b | Authorship eligibility guidelines and any intended use of professional writers  YES, page 1-2 |
|  | 31c | Plans, if any, for granting public access to the full protocol, participant-level dataset, and statistical code  yes |
| Appendices |  |  |
| Informed consent materials | 32 | Model consent form and other related documentation given to participants and authorised surrogates  no |
| Biological specimens | 33 | Plans for collection, laboratory evaluation, and storage of biological specimens for genetic or molecular analysis in the current trial and for future use in ancillary studies, if applicable  Not applicable |

*It is strongly recommended that this checklist be read in conjunction with the SPIRIT 2013 Explanation & Elaboration for important clarification on the items. Amendments to the protocol should be tracked and dated. The SPIRIT checklist is copyrighted by the SPIRIT Group under the Creative Commons “[Attribution-NonCommercial-NoDerivs 3.0 Unported](http://www.creativecommons.org/licenses/by-nc-nd/3.0/)” license.
